# Supplementary material
Source: PubMed Central journal article supplement (PMC4061726)
Supplement: NIHMS59125-supplement-Supplementary_figure_1.pdf [file NIHMS59125-supplement-Supplementary_figure_1.pdf]

**Aging, Neurotoxins, Inflammatory Triggers,  
Genetic Susceptibility**

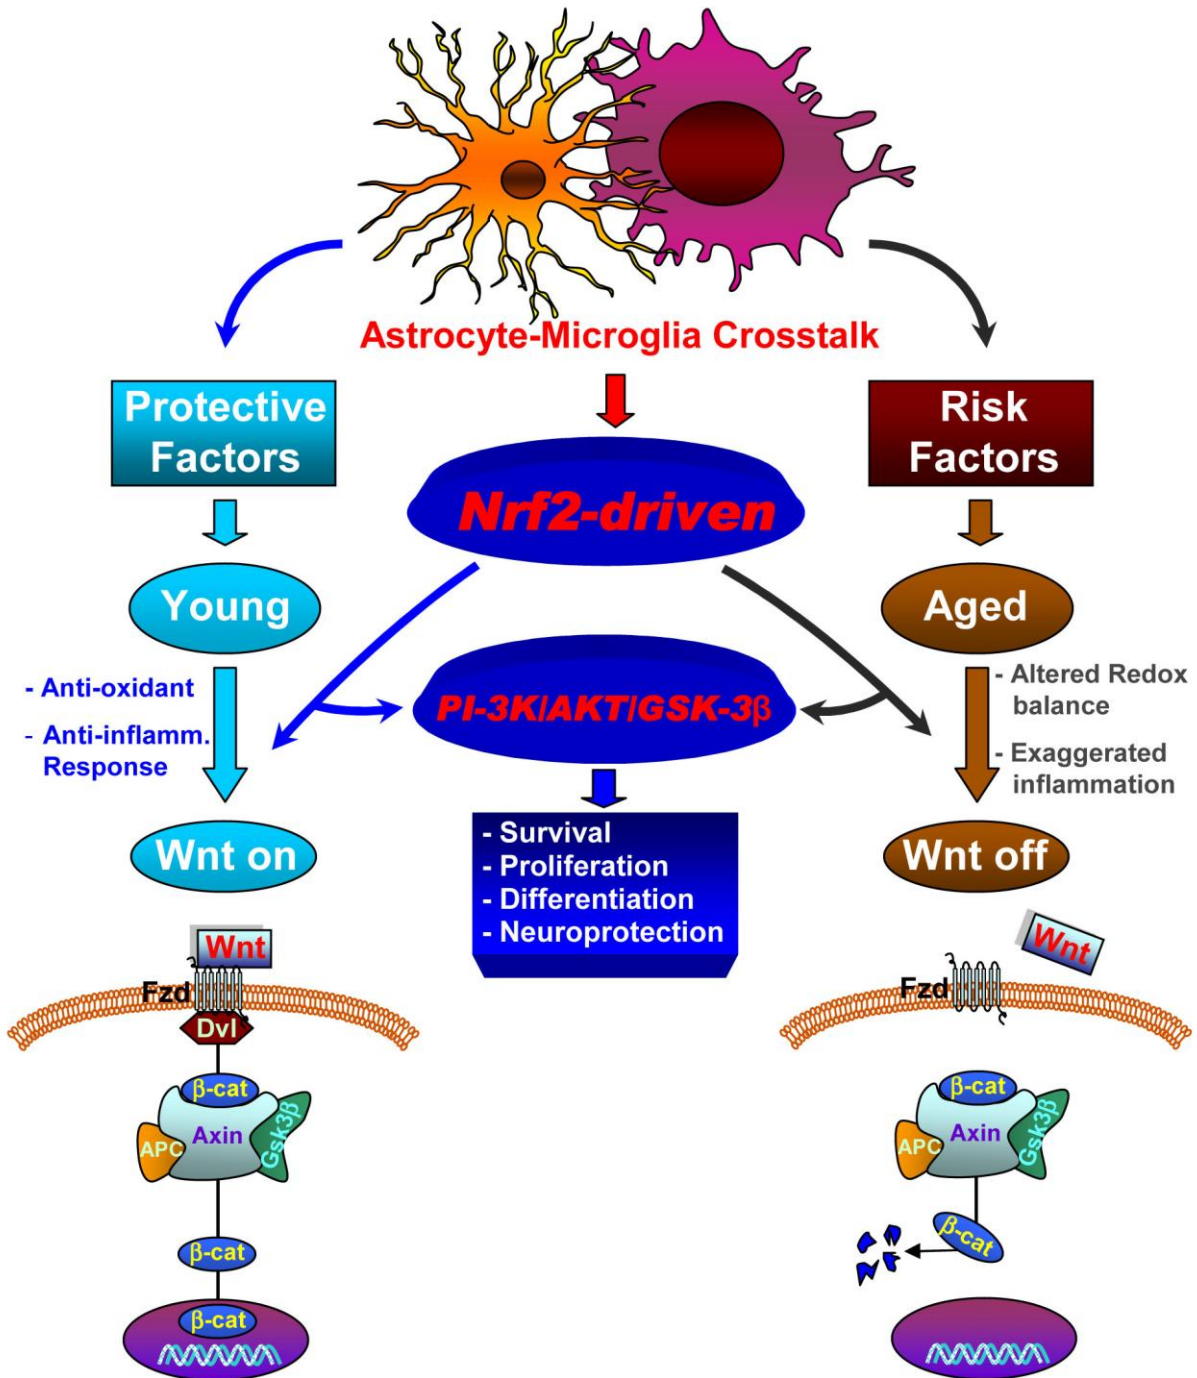

Supplementary Figure S1 Aging-induced Nrf2-ARE pathway disruption in the subventricular zone (SVZ) drives neurogenic impairment in parkinsonian mice via PI3K-Wnt/ $\beta$ -catenin dysregulation. In young mice a regulatory circuit linking microglial activation and pro-inflammatory cytokine to NF-E2-related factor 2 (Nrf2)-Anti-oxidant-responsive elements (ARE) protective pathway

in SVZ, provides an efficient self-adaptive mechanism against inflammatory/neurotoxin-induced oxidative stress. In addition to govern the redox balance within the SVZ niche, *Nrf2*-induced heme-oxygenase, *Hmox*, target gene may simultaneously protect astrocytes, thereby up-regulating the expression of vital Wnt signaling elements switching-on key components required for maintaining SVZ cells in a proliferative state, promote differentiation and/or for exerting neuroprotective effects. Crosstalk between two pivotal pathways, the phosphatidylinositol-3-kinase, PI3-K/Akt/GSK-3 $\beta$  and Wnt/ $\beta$ -catenin signaling cascades appear to cooperate to finely control the transcriptional activator,  $\beta$ -catenin, in turn representing a point of convergence to direct proliferation/differentiation/survival in SVZ stem niche. Importantly, SVZ “rejuvenation” may have beneficial consequences for DAergic neuroprotection, and viceversa (L’Episcopo et al., 2013). Astrocytes (blue), neuroblasts (red), transit-amplifying cells (yellow) and ependymal (purple) cells in SVZ niche are schematically illustrated (from L’Episcopo et al. 2013, with permission).

### Reference

L’Episcopo, F., Tirolo, C., Testa, N., et al. (2013). Aging-induced Nrf2-ARE pathway disruption in the subventricular zone (SVZ) drives neurogenic impairment in parkinsonian mice via PI3K-Wnt/ $\beta$ -catenin dysregulation. *J. Neurosci.* 33, 1462-1485.
